# Supplementary material
Source: Springer Nature journal article supplement (https://www.springermedizin.de/resource/supplementary/12936_2011_1921_MOESM5_ESM.pdf/9542058)

# Serum

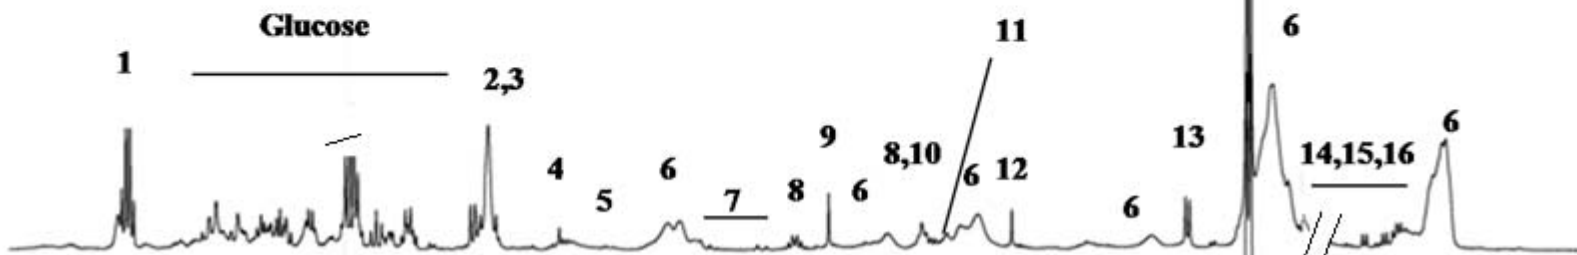

# Pleural effusion

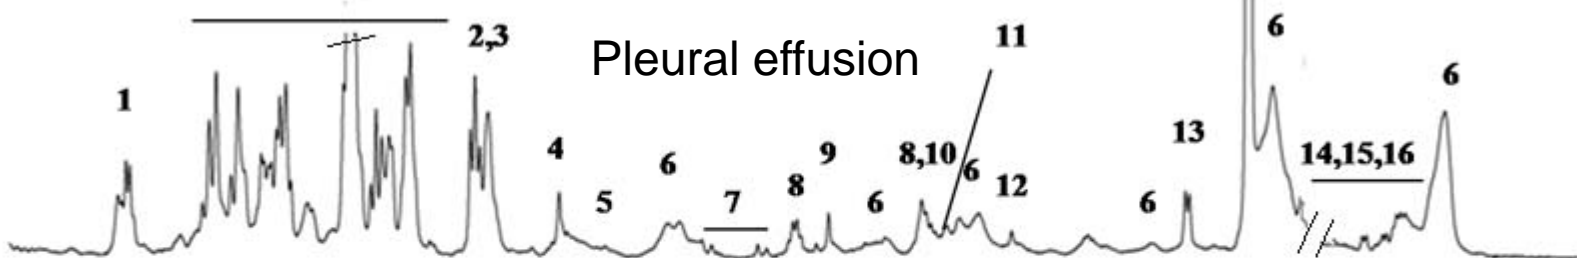

Chemical Shift

Supplement: MOESM5 [file 9542058]
